# Supplementary material for: New Method to Evaluate the Crosslinking Degree of Resin Finishing Agent with Cellulose Using Kjeldahl Method and Arrhenius Formula
Source: MDPI journal article supplement (doi:10.3390/pr9050767), 2021-04-27
Supplement: s1 [file s1]

**Table S1.** Nitrogen content with storage time under different storage temperatures.

| Storage time | N% at 40°C | N% at 50°C | N% at 60°C | N% at 70°C | N% at 80°C |
|--------------|------------|------------|------------|------------|------------|
| 1 day        | 0.021      | 0.041      | 0.050      | 0.056      | 0.063      |
| 2 day        | 0.045      | 0.105      | 0.086      | 0.122      | 0.132      |
| 3 day        | 0.071      | 0.135      | 0.140      | 0.152      | 0.209      |
| 4 day        | 0.093      | 0.162      | 0.175      | 0.210      | 0.267      |
| 5 day        | 0.105      | 0.180      | 0.213      | 0.269      | 0.287      |
| 6 day        | 0.125      | 0.200      | 0.235      | 0.305      | 0.338      |
| 7 day        | 0.156      | 0.223      | 0.270      | 0.317      | 0.364      |

**Table S2.** WRA (b) with storage time under different storage temperatures.

| Storage time | WRA at 40°C | WRA at 50°C | WRA at 60°C | WRA at 70°C | WRA at 80°C |
|--------------|-------------|-------------|-------------|-------------|-------------|
| 1 day        | 102         | 115         | 109         | 114         | 121         |
| 2 day        | 105         | 121         | 121         | 125         | 129         |
| 3 day        | 109         | 123         | 129         | 132         | 142         |
| 4 day        | 116         | 130         | 132         | 140         | 158         |
| 5 day        | 119         | 136         | 142         | 153         | 164         |
| 6 day        | 120         | 138         | 143         | 161         | 171         |
| 7 day        | 132         | 140         | 151         | 172         | 180         |

**Table S3.**  $\ln(N_m-N)/N_m$  with storage time under different storage temperatures.

| Storage time | $\ln(N_m-N)/N_m$<br>at 40°C | $\ln(N_m-N)/N_m$<br>at 50°C | $\ln(N_m-N)/N_m$<br>at 60°C | $\ln(N_m-N)/N_m$<br>at 70°C | $\ln(N_m-N)/N_m$<br>at 80°C |
|--------------|-----------------------------|-----------------------------|-----------------------------|-----------------------------|-----------------------------|
| 1 day        | -0.0372                     | -0.0740                     | -0.0909                     | -0.102                      | -0.116                      |
| 2 day        | -0.0815                     | -0.202                      | -0.161                      | -0.239                      | -0.261                      |
| 3 day        | -0.132                      | -0.268                      | -0.279                      | -0.306                      | -0.451                      |
| 4 day        | -0.176                      | -0.331                      | -0.363                      | -0.453                      | -0.614                      |
| 5 day        | -0.202                      | -0.375                      | -0.463                      | -0.629                      | -0.691                      |
| 6 day        | -0.245                      | -0.427                      | -0.525                      | -0.756                      | -0.881                      |
| 7 day        | -0.316                      | -0.491                      | -0.634                      | -0.803                      | -1.002                      |

$N_m=0.575\%$

**Table S4.**  $1/T$  and  $-\ln K$  under different storage temperatures.

| Storage temperature | Thermodynamic temperature (T) | $1/T$    | $K/(24h)^{-1}$ | $k/(s)$     | $-\ln K$ |
|---------------------|-------------------------------|----------|----------------|-------------|----------|
| 40°C                | 293                           | 0.003195 | 0.0441         | 0.00001225  | 11.3101  |
| 50°C                | 303                           | 0.003096 | 0.0646         | 1.79444E-05 | 10.9282  |
| 60°C                | 313                           | 0.003003 | 0.0908         | 2.52222E-05 | 10.5878  |
| 70°C                | 323                           | 0.002915 | 0.1235         | 3.43056E-05 | 10.2802  |
| 80°C                | 333                           | 0.002833 | 0.1478         | 4.10556E-05 | 10.1006  |
